# Supplementary material for: First record of the genus Venanus (Hymenoptera: Braconidae: Microgastrinae) in Mesoamerica, with the description of two new species from Costa Rica
Source: PubMed Central journal article supplement (PMC4238065; doi:10.3897/bdj.2.e4167), 2014-11-13

# BOLD TaxonID Tree

Title : SEARCH: Process ids(56 ids), Include public records [SEARCH2...  
Date : 31-October-2014  
Data Type : Nucleotide  
Distance Model : Kimura 2 Parameter  
Marker : COI-5P  
Codon Positions : 1st, 2nd, 3rd  
Labels : Country & Province, SampleID, Sequence Length  
Filters : Length > 150  
Colorization : [blue]=Stop Codons [red]=Contamination or misidentification

Sequence Count : 56  
Species count : 4  
Genus count : 1  
Family count : 1  
Unidentified : 0

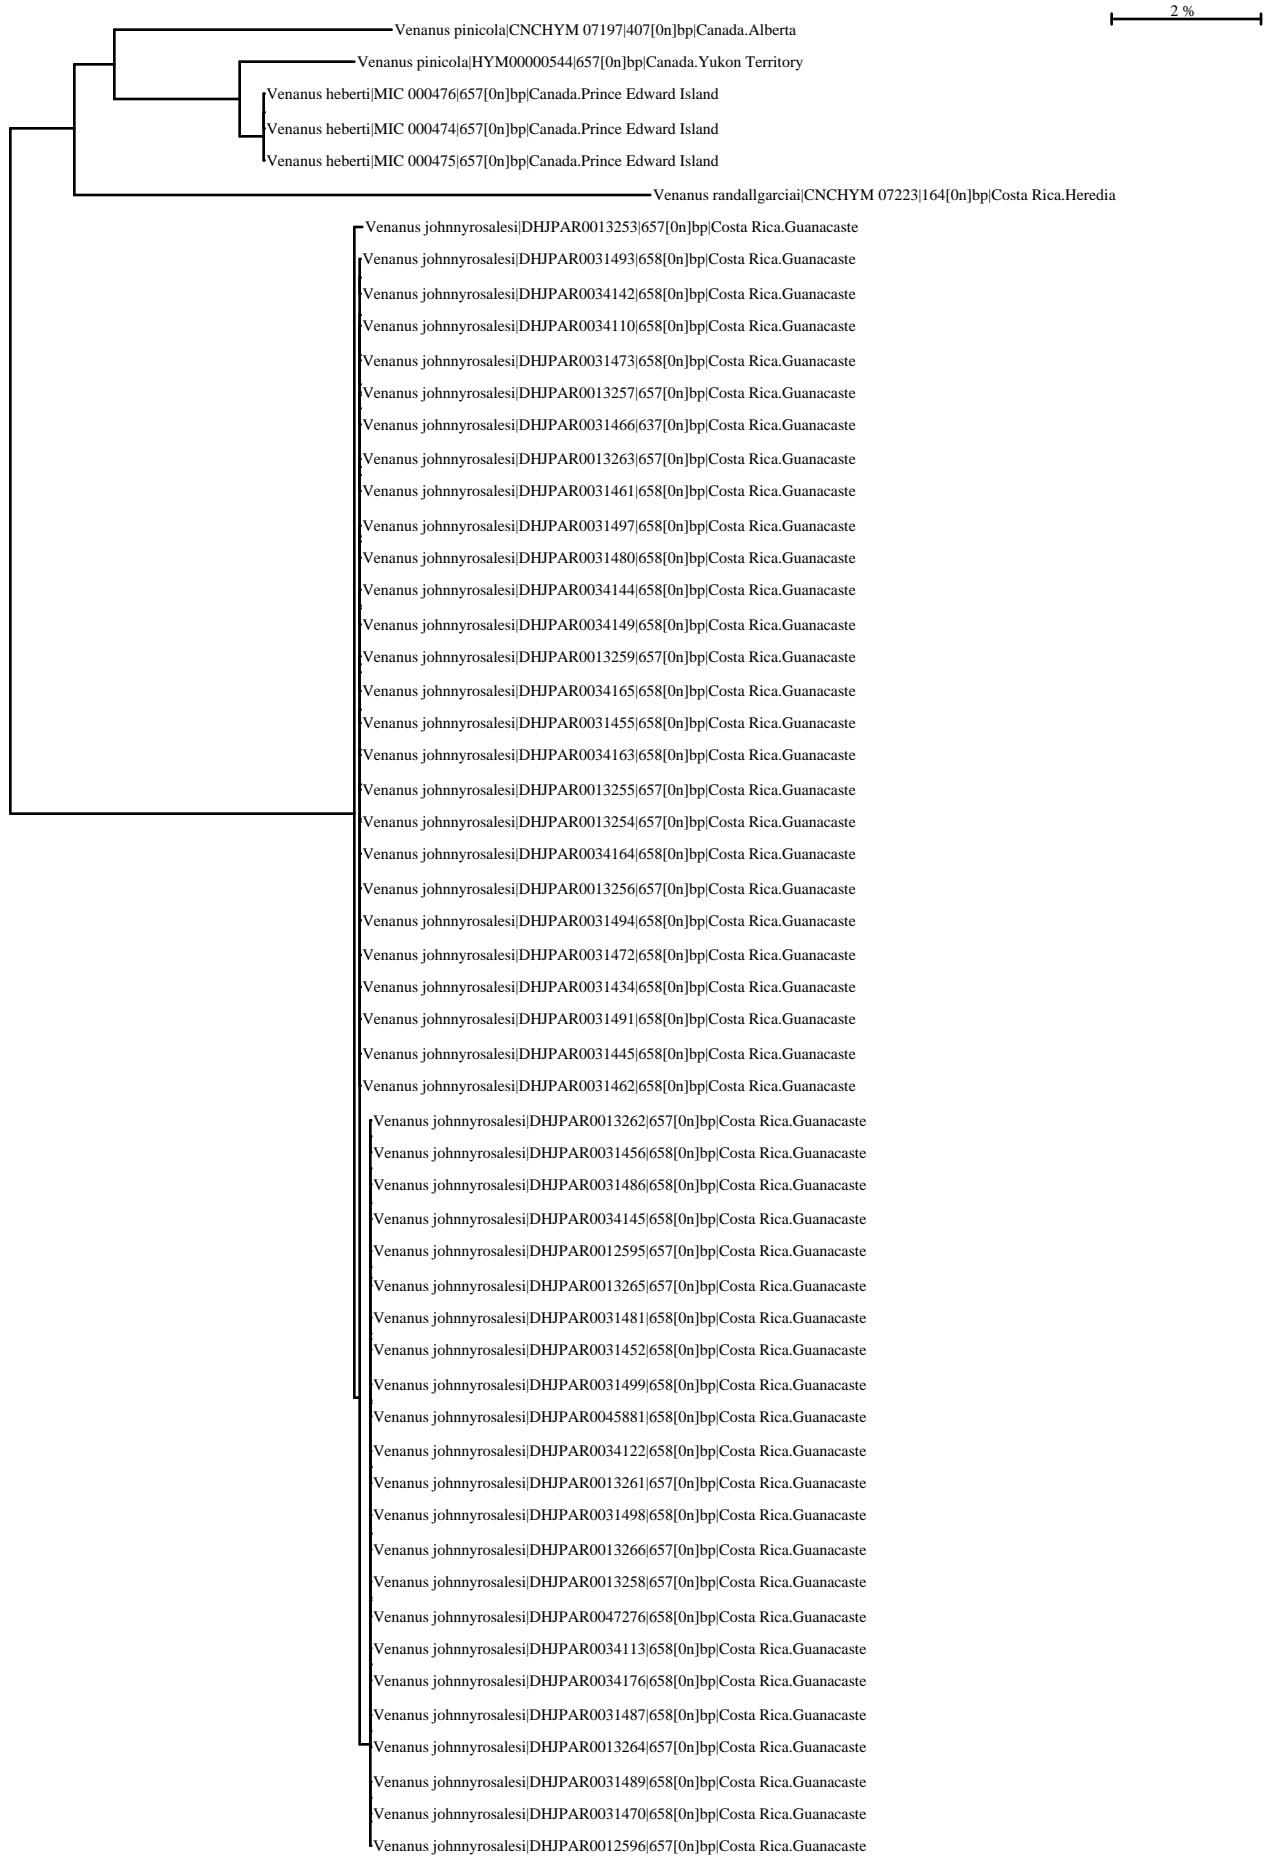

Supplement: biodiversity_data_journal-2-e4167-s001.pdf [file biodiversity_data_journal-2-e4167-s001.pdf]
